# Supplementary material for: A DNA methylation signature discriminates between excellent and non-response to lithium in patients with bipolar disorder type 1
Source: PubMed Central journal article supplement (PMC7376060; doi:10.1038/s41598-020-69073-0), 2020-07-22
Supplement: 41598_2020_69073_MOESM1_ESM.pdf [file 41598_2020_69073_MOESM1_ESM.pdf]

# A DNA methylation signature discriminates between excellent and non-response to lithium in patients with bipolar disorder type 1

*Running title: DNA methylation and response to lithium in BD*

Marie-Claire C <sup>1</sup>, Lejeune FX <sup>5</sup>, Mundwiler E <sup>4</sup>, Uveling D <sup>5</sup>, Moszer I <sup>5</sup>, Bellivier F <sup>\*1,2,3,6</sup>, Etain B <sup>1,2,3,6</sup>

1) Optimisation thérapeutique en neuropsychopharmacologie, INSERM U1144, Université de Paris, Université Sorbonne Paris Cité, Paris, France ;

2) AP-HP, GH Saint-Louis – Lariboisière – F. Widal, Pole de Psychiatrie et de Médecine Addictologique, Paris, France;

3) Fondation FondaMental, Créteil, France;

4) IGenSeq, Institut du Cerveau et de la Moelle Épinière, Paris, France;

5) Bioinformatics and Biostatistics Core Facility iCONICS, Inserm U 1127, CNRS UMR 7225, Sorbonne Université UMR S 1127, Institut du Cerveau et de la Moelle Épinière, Paris, France ;

6) Université de Paris, faculté de Médecine, Paris, France.

\* Corresponding author: [cynthia.marie-claire@parisdescartes.fr](mailto:cynthia.marie-claire@parisdescartes.fr)

**Supplementary Figure 1:** Predicted proportions of T lymphocytes (CD8T and CD4T), Natural killer cells (NK), B Lymphocytes (Bcell), Monocytes (Mono) and granulocytes (Gran) in peripheral blood samples from Li excellent responders and non responders.

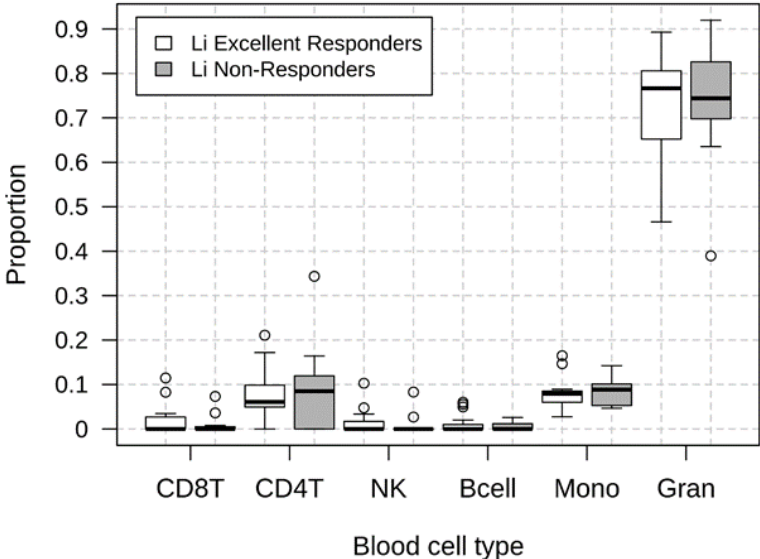

**Supplementary Figure 2:** Box plots of the individual methylation levels of the 7 DMRs in the 15 LiER and 11 LiNR included in the initial analysis and additional 14 LiPR. Results of the one way ANOVA (Welch's) are presented for each DMR.

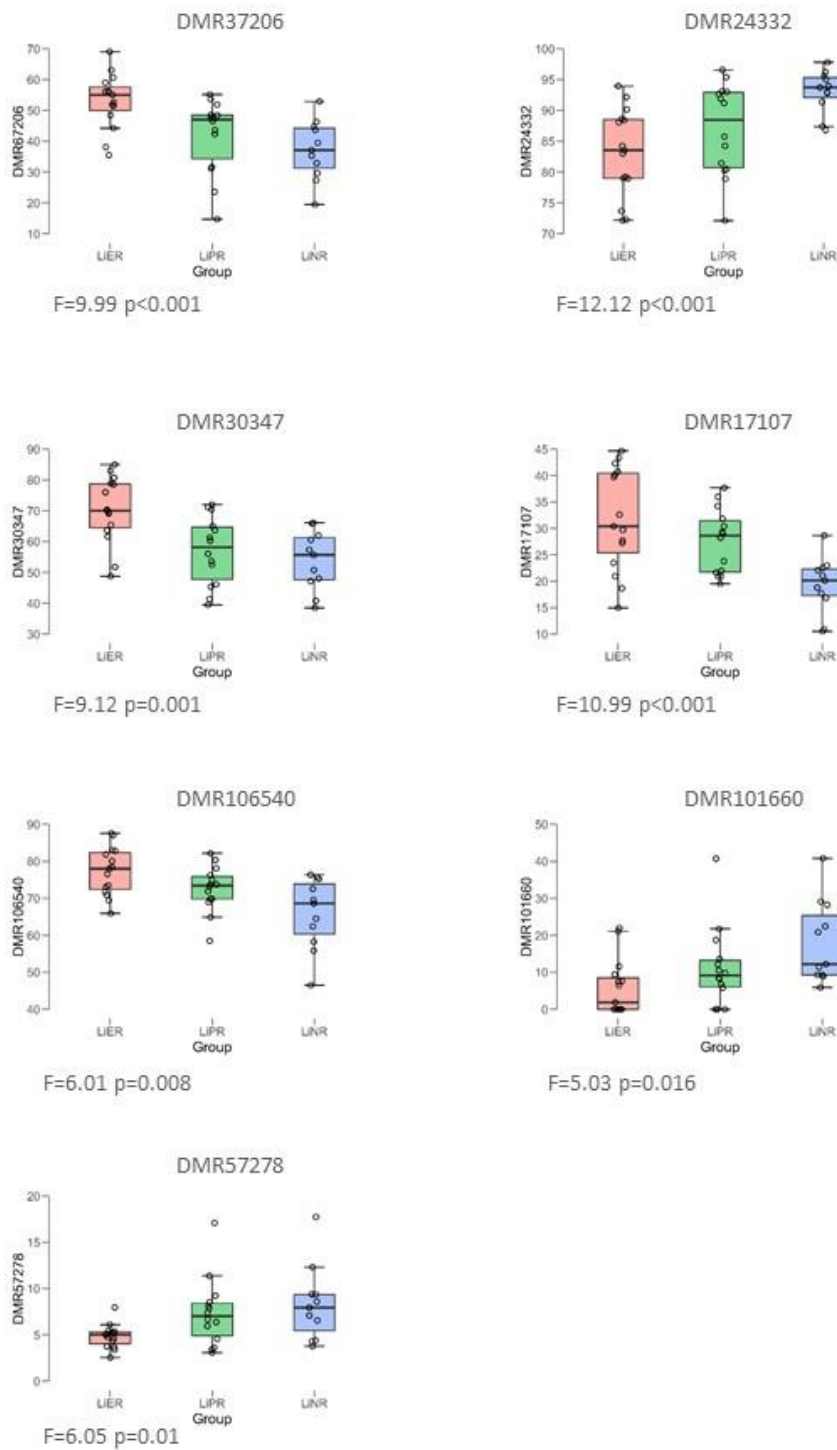

**Supplementary Figure 3:** Correlation (Spearman correlation value) of blood and three brain regions methylation for the five CpG present in the Blood-Brain Epigenetic Concordance (BECon) database. Values were generated from the Blood-Brain Epigenetic Concordance database (<https://redgar598.shinyapps.io/BECon/>). BA10 (Brodmann area 10, prefrontal cortex; BA7 (Brodmann area 7, parietal cortex), BA20 (Brodmann area 20, temporal cortex).

| Chr        | Coor | Gene(s)   | Gene Region(s)           | Variability                    |      |      |       | Correlation |       |      | Cell Composition |       | Correlation or Cell Composition Percentile or Variability Status |                   |
|------------|------|-----------|--------------------------|--------------------------------|------|------|-------|-------------|-------|------|------------------|-------|------------------------------------------------------------------|-------------------|
|            |      |           |                          | BA10                           | BA20 | BA7  | Blood | BA10        | BA20  | BA7  | Blood            | Brain |                                                                  |                   |
| cg03292743 | 2    | 74642838  | C2orf81                  | intragenic                     | 0.1  | 0.08 | 0.1   | 0.22        | 0.44  | 0.04 | 0.32             | 0.03  | 0.01                                                             | 80% (Positive)    |
| cg04490945 | 3    | 183959485 | MIR1224, VWASB2, MIR1224 | three_plus, intragenic, promot | 0.07 | 0.07 | 0.04  | 0.15        | -0.22 | 0.17 | 0.19             | 0.03  | 0.01                                                             | 75-90% (Positive) |
| cg16625004 | 3    | 183959550 | MIR1224, VWASB2          | three_plus, intragenic         | 0.04 | 0.06 | 0.04  | 0.08        | 0.4   | 0.26 | 0.01             | 0.02  | 0                                                                | 50-75% (Positive) |
| cg08411860 | 3    | 183959746 | VWASB2                   | intragenic                     | 0.07 | 0.07 | 0.05  | 0.13        | 0.08  | 0.27 | -0.41            | 0.03  | 0.01                                                             | <50% (Positive)   |
| cg24363374 | 3    | 183959853 | VWASB2, ALG3             | three_plus, three_plus         | 0.09 | 0.1  | 0.1   | 0.15        | 0.29  | 0.44 | 0.04             | 0.04  | 0.02                                                             | <50% (Negative)   |

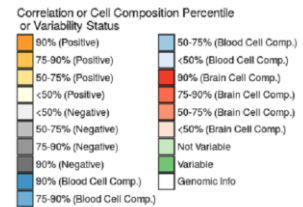

**Supplementary Table 1:** List of the cell type specific CpGs used for blood cell types determination

| List of 600 cell type specific CpGs (Jaffe & Irizarry, Genome Biol. 2014) | CpGs used in BD methylation analysis |
|---------------------------------------------------------------------------|--------------------------------------|
| cg00058449                                                                | TRUE                                 |
| cg00091349                                                                | TRUE                                 |
| cg00103299                                                                | TRUE                                 |
| cg00149213                                                                | TRUE                                 |
| cg00159243                                                                | TRUE                                 |
| cg00208012                                                                | TRUE                                 |
| cg00219921                                                                | FALSE                                |
| cg00221794                                                                | TRUE                                 |
| cg00287915                                                                | TRUE                                 |
| cg00288598                                                                | TRUE                                 |
| cg00366435                                                                | TRUE                                 |
| cg00369058                                                                | TRUE                                 |
| cg00439981                                                                | TRUE                                 |
| cg00440980                                                                | TRUE                                 |
| cg00445959                                                                | FALSE                                |
| cg00458681                                                                | TRUE                                 |
| cg00619207                                                                | TRUE                                 |
| cg00629585                                                                | TRUE                                 |
| cg00644351                                                                | TRUE                                 |
| cg00660167                                                                | TRUE                                 |
| cg00661777                                                                | TRUE                                 |
| cg00701951                                                                | TRUE                                 |
| cg00702872                                                                | TRUE                                 |
| cg00705730                                                                | TRUE                                 |
| cg00719568                                                                | TRUE                                 |
| cg00760938                                                                | TRUE                                 |
| cg00782811                                                                | TRUE                                 |
| cg00795812                                                                | TRUE                                 |
| cg00813999                                                                | TRUE                                 |
| cg00970435                                                                | TRUE                                 |
| cg00984060                                                                | FALSE                                |
| cg01002223                                                                | TRUE                                 |
| cg01024458                                                                | TRUE                                 |
| cg01040649                                                                | TRUE                                 |
| cg01154505                                                                | FALSE                                |
| cg01156249                                                                | TRUE                                 |
| cg01367627                                                                | TRUE                                 |

|            |       |
|------------|-------|
| cg01383401 | TRUE  |
| cg01447281 | FALSE |
| cg01525879 | TRUE  |
| cg01582066 | TRUE  |
| cg01692842 | TRUE  |
| cg01710351 | TRUE  |
| cg01874152 | TRUE  |
| cg01881899 | TRUE  |
| cg01940139 | TRUE  |
| cg01987702 | TRUE  |
| cg02016178 | TRUE  |
| cg02021288 | FALSE |
| cg02150910 | TRUE  |
| cg02212339 | TRUE  |
| cg02212836 | TRUE  |
| cg02237342 | TRUE  |
| cg02256631 | FALSE |
| cg02321062 | TRUE  |
| cg02331830 | TRUE  |
| cg02366988 | TRUE  |
| cg02384859 | TRUE  |
| cg02402946 | FALSE |
| cg02573468 | TRUE  |
| cg02598071 | TRUE  |
| cg02606840 | TRUE  |
| cg02661764 | TRUE  |
| cg02665297 | TRUE  |
| cg02720566 | TRUE  |
| cg02734358 | TRUE  |
| cg02821342 | TRUE  |
| cg02861441 | TRUE  |
| cg02861504 | TRUE  |
| cg02964396 | FALSE |
| cg03055671 | FALSE |
| cg03077671 | TRUE  |
| cg03146219 | TRUE  |
| cg03196485 | TRUE  |
| cg03209642 | FALSE |
| cg03268893 | TRUE  |
| cg03278514 | TRUE  |
| cg03313271 | TRUE  |
| cg03318654 | TRUE  |
| cg03340036 | TRUE  |
| cg03347559 | TRUE  |
| cg03379131 | TRUE  |
| cg03419136 | TRUE  |

|            |       |
|------------|-------|
| cg03429643 | TRUE  |
| cg03538296 | TRUE  |
| cg03605454 | TRUE  |
| cg03637218 | TRUE  |
| cg03708221 | TRUE  |
| cg03722295 | TRUE  |
| cg03795574 | TRUE  |
| cg03861966 | TRUE  |
| cg03887528 | TRUE  |
| cg03889044 | TRUE  |
| cg03984502 | TRUE  |
| cg03989617 | FALSE |
| cg03992638 | TRUE  |
| cg04050463 | FALSE |
| cg04153882 | TRUE  |
| cg04244970 | TRUE  |
| cg04276058 | TRUE  |
| cg04307083 | TRUE  |
| cg04329870 | TRUE  |
| cg04453471 | TRUE  |
| cg04468741 | TRUE  |
| cg04606170 | TRUE  |
| cg04609694 | TRUE  |
| cg04658357 | TRUE  |
| cg04828493 | FALSE |
| cg04838847 | TRUE  |
| cg04855678 | FALSE |
| cg04858164 | FALSE |
| cg04859102 | TRUE  |
| cg04910877 | TRUE  |
| cg04947157 | TRUE  |
| cg04978343 | TRUE  |
| cg05041073 | TRUE  |
| cg05070273 | TRUE  |
| cg05205074 | TRUE  |
| cg05298628 | TRUE  |
| cg05371506 | TRUE  |
| cg05398700 | FALSE |
| cg05492387 | FALSE |
| cg05496363 | TRUE  |
| cg05517541 | TRUE  |
| cg05579731 | TRUE  |
| cg05604112 | TRUE  |
| cg05617307 | TRUE  |
| cg05627557 | FALSE |
| cg05653887 | TRUE  |

|            |       |
|------------|-------|
| cg05723552 | TRUE  |
| cg05859076 | TRUE  |
| cg05870586 | TRUE  |
| cg05875239 | TRUE  |
| cg05923857 | TRUE  |
| cg05936004 | FALSE |
| cg06015525 | TRUE  |
| cg06040872 | TRUE  |
| cg06117093 | TRUE  |
| cg06202778 | TRUE  |
| cg06270401 | FALSE |
| cg06317348 | FALSE |
| cg06329392 | FALSE |
| cg06398474 | TRUE  |
| cg06419846 | TRUE  |
| cg06449334 | TRUE  |
| cg06465076 | TRUE  |
| cg06470558 | TRUE  |
| cg06489037 | TRUE  |
| cg06526020 | TRUE  |
| cg06690168 | TRUE  |
| cg06889975 | TRUE  |
| cg06975311 | TRUE  |
| cg07002540 | TRUE  |
| cg07016730 | TRUE  |
| cg07019638 | TRUE  |
| cg07196673 | TRUE  |
| cg07212327 | TRUE  |
| cg07248223 | TRUE  |
| cg07307830 | TRUE  |
| cg07363543 | TRUE  |
| cg07427475 | FALSE |
| cg07489413 | TRUE  |
| cg07546943 | TRUE  |
| cg07584558 | TRUE  |
| cg07590102 | TRUE  |
| cg07597976 | TRUE  |
| cg07616394 | TRUE  |
| cg07635227 | FALSE |
| cg07661835 | TRUE  |
| cg07675477 | TRUE  |
| cg07679948 | TRUE  |
| cg07698804 | TRUE  |
| cg07700837 | TRUE  |
| cg07702659 | TRUE  |
| cg07721872 | TRUE  |



|            |       |
|------------|-------|
| cg07725527 | FALSE |
| cg07728865 | TRUE  |
| cg07746532 | TRUE  |
| cg07754940 | TRUE  |
| cg07809589 | FALSE |
| cg07837085 | TRUE  |
| cg07881210 | TRUE  |
| cg07930752 | FALSE |
| cg07970799 | TRUE  |
| cg07978738 | TRUE  |
| cg08130572 | FALSE |
| cg08154963 | FALSE |
| cg08224785 | FALSE |
| cg08253808 | TRUE  |
| cg08280936 | TRUE  |
| cg08506127 | TRUE  |
| cg08549335 | TRUE  |
| cg08560387 | FALSE |
| cg08608952 | TRUE  |
| cg08635931 | TRUE  |
| cg08645860 | FALSE |
| cg08661469 | TRUE  |
| cg08682625 | TRUE  |
| cg08694574 | TRUE  |
| cg08698943 | TRUE  |
| cg08769189 | TRUE  |
| cg08777095 | FALSE |
| cg08817540 | TRUE  |
| cg08864105 | TRUE  |
| cg08884752 | TRUE  |
| cg08908131 | TRUE  |
| cg09220326 | TRUE  |
| cg09221159 | TRUE  |
| cg09257735 | FALSE |
| cg09261289 | TRUE  |
| cg09300089 | TRUE  |
| cg09318840 | TRUE  |
| cg09322573 | TRUE  |
| cg09342997 | TRUE  |
| cg09421111 | FALSE |
| cg09490277 | TRUE  |
| cg09543427 | TRUE  |
| cg09610286 | TRUE  |
| cg09654116 | FALSE |
| cg09662852 | TRUE  |
| cg09712234 | TRUE  |

|            |       |
|------------|-------|
| cg09849688 | FALSE |
| cg09859659 | TRUE  |
| cg09958801 | FALSE |
| cg09960724 | TRUE  |
| cg09993145 | FALSE |
| cg10054641 | TRUE  |
| cg10057264 | TRUE  |
| cg10096215 | TRUE  |
| cg10142452 | TRUE  |
| cg10274029 | TRUE  |
| cg10278149 | TRUE  |
| cg10373891 | TRUE  |
| cg10480329 | FALSE |
| cg10499974 | TRUE  |
| cg10502324 | TRUE  |
| cg10505873 | FALSE |
| cg10516886 | TRUE  |
| cg10536999 | TRUE  |
| cg10578938 | TRUE  |
| cg10611016 | TRUE  |
| cg10624395 | TRUE  |
| cg10628126 | TRUE  |
| cg10639435 | TRUE  |
| cg10699171 | TRUE  |
| cg10761804 | TRUE  |
| cg10768932 | TRUE  |
| cg10782923 | TRUE  |
| cg10812236 | TRUE  |
| cg10825315 | TRUE  |
| cg10825530 | TRUE  |
| cg10837404 | FALSE |
| cg10837858 | TRUE  |
| cg10879992 | TRUE  |
| cg10880902 | TRUE  |
| cg10944833 | FALSE |
| cg11014468 | TRUE  |
| cg11067179 | TRUE  |
| cg11070172 | TRUE  |
| cg11163777 | TRUE  |
| cg11176694 | TRUE  |
| cg11186858 | TRUE  |
| cg11230435 | TRUE  |
| cg11354682 | TRUE  |
| cg11411904 | TRUE  |
| cg11465943 | TRUE  |
| cg11525052 | TRUE  |

|            |       |
|------------|-------|
| cg11531557 | FALSE |
| cg11557901 | TRUE  |
| cg11637084 | TRUE  |
| cg11661493 | TRUE  |
| cg11671771 | FALSE |
| cg11774624 | TRUE  |
| cg11811510 | TRUE  |
| cg11837293 | FALSE |
| cg11906021 | FALSE |
| cg11944101 | TRUE  |
| cg11977716 | FALSE |
| cg11978441 | TRUE  |
| cg11992736 | FALSE |
| cg12032027 | TRUE  |
| cg12105450 | TRUE  |
| cg12177944 | TRUE  |
| cg12182124 | TRUE  |
| cg12207930 | TRUE  |
| cg12294633 | TRUE  |
| cg12297231 | FALSE |
| cg12344862 | FALSE |
| cg12403778 | TRUE  |
| cg12477370 | TRUE  |
| cg12480903 | TRUE  |
| cg12483340 | TRUE  |
| cg12531611 | TRUE  |
| cg12655112 | TRUE  |
| cg12793123 | TRUE  |
| cg12838644 | FALSE |
| cg12996622 | TRUE  |
| cg13027206 | FALSE |
| cg13066703 | TRUE  |
| cg13068915 | FALSE |
| cg13093111 | TRUE  |
| cg13133835 | FALSE |
| cg13203135 | TRUE  |
| cg13209388 | TRUE  |
| cg13315450 | FALSE |
| cg13356455 | TRUE  |
| cg13430807 | FALSE |
| cg13437525 | TRUE  |
| cg13449535 | TRUE  |
| cg13468144 | TRUE  |
| cg13525276 | TRUE  |
| cg13543915 | FALSE |
| cg13595556 | FALSE |

|                   |       |
|-------------------|-------|
| <b>cg13617280</b> | TRUE  |
| <b>cg13651908</b> | TRUE  |
| <b>cg13652008</b> | TRUE  |
| <b>cg13695076</b> | TRUE  |
| <b>cg13738327</b> | TRUE  |
| <b>cg13785123</b> | TRUE  |
| <b>cg13828440</b> | TRUE  |
| <b>cg13924996</b> | FALSE |
| <b>cg13947995</b> | TRUE  |
| <b>cg14011327</b> | TRUE  |
| <b>cg14032529</b> | TRUE  |
| <b>cg14082886</b> | FALSE |
| <b>cg14084689</b> | FALSE |
| <b>cg14109551</b> | TRUE  |
| <b>cg14135025</b> | FALSE |
| <b>cg14145194</b> | TRUE  |
| <b>cg14284211</b> | TRUE  |
| <b>cg14301562</b> | TRUE  |
| <b>cg14317609</b> | FALSE |
| <b>cg14331899</b> | TRUE  |
| <b>cg14364797</b> | FALSE |
| <b>cg14384416</b> | TRUE  |
| <b>cg14477767</b> | TRUE  |
| <b>cg14482811</b> | TRUE  |
| <b>cg14496375</b> | FALSE |
| <b>cg14555759</b> | FALSE |
| <b>cg14564351</b> | TRUE  |
| <b>cg14574996</b> | FALSE |
| <b>cg14583973</b> | TRUE  |
| <b>cg14595786</b> | TRUE  |
| <b>cg14655843</b> | TRUE  |
| <b>cg14729344</b> | FALSE |
| <b>cg14936008</b> | TRUE  |
| <b>cg15014975</b> | TRUE  |
| <b>cg15029631</b> | TRUE  |
| <b>cg15035590</b> | TRUE  |
| <b>cg15086439</b> | TRUE  |
| <b>cg15087459</b> | TRUE  |
| <b>cg15114607</b> | TRUE  |
| <b>cg15153141</b> | TRUE  |
| <b>cg15241779</b> | TRUE  |
| <b>cg15258980</b> | TRUE  |
| <b>cg15348679</b> | TRUE  |
| <b>cg15384400</b> | TRUE  |
| <b>cg15459165</b> | TRUE  |
| <b>cg15474337</b> | TRUE  |

|            |       |
|------------|-------|
| cg15532942 | FALSE |
| cg15535471 | TRUE  |
| cg15555970 | FALSE |
| cg15564619 | TRUE  |
| cg15595502 | TRUE  |
| cg15657641 | TRUE  |
| cg15691199 | TRUE  |
| cg15791438 | TRUE  |
| cg15821562 | TRUE  |
| cg15878616 | TRUE  |
| cg15906007 | TRUE  |
| cg15956469 | FALSE |
| cg16013543 | TRUE  |
| cg16047279 | FALSE |
| cg16148346 | TRUE  |
| cg16210395 | TRUE  |
| cg16212145 | TRUE  |
| cg16235995 | FALSE |
| cg16256390 | FALSE |
| cg16429499 | TRUE  |
| cg16519762 | FALSE |
| cg16582517 | TRUE  |
| cg16596052 | FALSE |
| cg16636767 | FALSE |
| cg16654610 | TRUE  |
| cg16681873 | TRUE  |
| cg16802439 | TRUE  |
| cg16836311 | TRUE  |
| cg16893868 | FALSE |
| cg16941568 | FALSE |
| cg17117981 | TRUE  |
| cg17202724 | TRUE  |
| cg17232476 | TRUE  |
| cg17266282 | FALSE |
| cg17343167 | FALSE |
| cg17346246 | TRUE  |
| cg17638468 | TRUE  |
| cg17694130 | FALSE |
| cg17768768 | TRUE  |
| cg17830204 | FALSE |
| cg17851021 | TRUE  |
| cg17852482 | TRUE  |
| cg17879722 | TRUE  |
| cg17995557 | TRUE  |
| cg18050634 | FALSE |
| cg18055007 | TRUE  |

|                   |       |
|-------------------|-------|
| <b>cg18066690</b> | TRUE  |
| <b>cg18067520</b> | TRUE  |
| <b>cg18081760</b> | FALSE |
| <b>cg18128887</b> | FALSE |
| <b>cg18149207</b> | TRUE  |
| <b>cg18154117</b> | TRUE  |
| <b>cg18174654</b> | FALSE |
| <b>cg18184053</b> | TRUE  |
| <b>cg18224038</b> | TRUE  |
| <b>cg18250453</b> | FALSE |
| <b>cg18310515</b> | TRUE  |
| <b>cg18437209</b> | FALSE |
| <b>cg18546384</b> | TRUE  |
| <b>cg18582260</b> | TRUE  |
| <b>cg18672716</b> | TRUE  |
| <b>cg18701685</b> | FALSE |
| <b>cg18734095</b> | FALSE |
| <b>cg18800235</b> | TRUE  |
| <b>cg18830527</b> | TRUE  |
| <b>cg18835472</b> | TRUE  |
| <b>cg18857618</b> | TRUE  |
| <b>cg18865207</b> | TRUE  |
| <b>cg18881723</b> | TRUE  |
| <b>cg18886071</b> | TRUE  |
| <b>cg18923906</b> | FALSE |
| <b>cg18990407</b> | TRUE  |
| <b>cg19037107</b> | TRUE  |
| <b>cg19055828</b> | TRUE  |
| <b>cg19066520</b> | TRUE  |
| <b>cg19269039</b> | TRUE  |
| <b>cg19276014</b> | TRUE  |
| <b>cg19296305</b> | TRUE  |
| <b>cg19301114</b> | TRUE  |
| <b>cg19358608</b> | TRUE  |
| <b>cg19387310</b> | TRUE  |
| <b>cg19408207</b> | TRUE  |
| <b>cg19410791</b> | TRUE  |
| <b>cg19455189</b> | TRUE  |
| <b>cg19460836</b> | TRUE  |
| <b>cg19594892</b> | FALSE |
| <b>cg19612309</b> | TRUE  |
| <b>cg19679865</b> | TRUE  |
| <b>cg19696012</b> | TRUE  |
| <b>cg19730972</b> | TRUE  |
| <b>cg19835973</b> | TRUE  |
| <b>cg19927257</b> | FALSE |

|            |       |
|------------|-------|
| cg19933595 | TRUE  |
| cg20146241 | FALSE |
| cg20450123 | TRUE  |
| cg20460771 | TRUE  |
| cg20525486 | TRUE  |
| cg20602300 | FALSE |
| cg20610950 | TRUE  |
| cg20641531 | TRUE  |
| cg20657709 | TRUE  |
| cg20660269 | TRUE  |
| cg20681931 | FALSE |
| cg20737812 | TRUE  |
| cg20786131 | TRUE  |
| cg20978247 | TRUE  |
| cg21057323 | TRUE  |
| cg21091766 | TRUE  |
| cg21220520 | TRUE  |
| cg21221767 | TRUE  |
| cg21248060 | FALSE |
| cg21254939 | TRUE  |
| cg21268578 | FALSE |
| cg21285555 | TRUE  |
| cg21291385 | TRUE  |
| cg21333217 | TRUE  |
| cg21350349 | TRUE  |
| cg21467614 | TRUE  |
| cg21474838 | TRUE  |
| cg21565496 | TRUE  |
| cg21596498 | TRUE  |
| cg21634628 | TRUE  |
| cg21671607 | TRUE  |
| cg21683390 | TRUE  |
| cg21685770 | FALSE |
| cg21743182 | TRUE  |
| cg21761853 | TRUE  |
| cg21792134 | TRUE  |
| cg22001211 | TRUE  |
| cg22014398 | FALSE |
| cg22065498 | FALSE |
| cg22153728 | TRUE  |
| cg22212560 | FALSE |
| cg22222999 | TRUE  |
| cg22381196 | FALSE |
| cg22498365 | TRUE  |
| cg22563987 | TRUE  |
| cg22620363 | TRUE  |

|            |       |
|------------|-------|
| cg22632840 | FALSE |
| cg22651103 | TRUE  |
| cg22708902 | FALSE |
| cg22749642 | TRUE  |
| cg22903735 | TRUE  |
| cg22907103 | FALSE |
| cg23045908 | FALSE |
| cg23053742 | TRUE  |
| cg23169883 | TRUE  |
| cg23213217 | TRUE  |
| cg23244761 | TRUE  |
| cg23272399 | TRUE  |
| cg23325335 | TRUE  |
| cg23357533 | TRUE  |
| cg23357708 | TRUE  |
| cg23358740 | TRUE  |
| cg23391288 | TRUE  |
| cg23398076 | TRUE  |
| cg23624705 | TRUE  |
| cg23643435 | TRUE  |
| cg23661721 | TRUE  |
| cg23673974 | TRUE  |
| cg23683962 | TRUE  |
| cg23723835 | TRUE  |
| cg23763137 | TRUE  |
| cg23792308 | TRUE  |
| cg23819411 | TRUE  |
| cg23954655 | TRUE  |
| cg24088496 | TRUE  |
| cg24238409 | TRUE  |
| cg24345747 | TRUE  |
| cg24365417 | TRUE  |
| cg24430034 | TRUE  |
| cg24462702 | TRUE  |
| cg24641737 | TRUE  |
| cg24662823 | TRUE  |
| cg24788483 | TRUE  |
| cg24838825 | TRUE  |
| cg24904788 | TRUE  |
| cg24957609 | TRUE  |
| cg25006077 | TRUE  |
| cg25104621 | TRUE  |
| cg25131632 | TRUE  |
| cg25235205 | FALSE |
| cg25350872 | FALSE |
| cg25383568 | TRUE  |



|            |       |
|------------|-------|
| cg25416125 | TRUE  |
| cg25486399 | TRUE  |
| cg25496930 | TRUE  |
| cg25518868 | TRUE  |
| cg25535316 | FALSE |
| cg25554283 | TRUE  |
| cg25598890 | TRUE  |
| cg25599673 | TRUE  |
| cg25600606 | TRUE  |
| cg25605731 | TRUE  |
| cg25616055 | TRUE  |
| cg25683989 | TRUE  |
| cg25719851 | TRUE  |
| cg25729350 | TRUE  |
| cg25739938 | TRUE  |
| cg25848037 | TRUE  |
| cg25856090 | TRUE  |
| cg25887844 | TRUE  |
| cg25893560 | TRUE  |
| cg25898577 | TRUE  |
| cg25939861 | TRUE  |
| cg26012482 | TRUE  |
| cg26056277 | TRUE  |
| cg26121053 | TRUE  |
| cg26166854 | TRUE  |
| cg26169783 | FALSE |
| cg26227465 | TRUE  |
| cg26270899 | TRUE  |
| cg26341831 | TRUE  |
| cg26538782 | FALSE |
| cg26552743 | TRUE  |
| cg26562691 | TRUE  |
| cg26572165 | TRUE  |
| cg26692003 | TRUE  |
| cg26707718 | FALSE |
| cg26795340 | TRUE  |
| cg26872907 | TRUE  |
| cg26896499 | FALSE |
| cg26971042 | TRUE  |
| cg26986871 | TRUE  |
| cg27027151 | TRUE  |
| cg27043010 | FALSE |
| cg27058497 | TRUE  |
| cg27059140 | TRUE  |
| cg27106643 | TRUE  |
| cg27118278 | FALSE |

|                      |       |
|----------------------|-------|
| <b>cg27122888</b>    | TRUE  |
| <b>cg27166718</b>    | TRUE  |
| <b>cg27202779</b>    | FALSE |
| <b>cg27309871</b>    | TRUE  |
| <b>cg27366072</b>    | TRUE  |
| <b>cg27423838</b>    | TRUE  |
| <b>cg27485845</b>    | TRUE  |
| <b>cg27506442</b>    | TRUE  |
| <b>cg27507284</b>    | TRUE  |
| <b>cg27582527</b>    | TRUE  |
| <b>ch.17.480931F</b> | FALSE |

**Supplementary Table 2:** List of the 74 genes associated with the 111 identified DMRs (FDR 0.05)

| <b>Official gene symbol</b>       | <b>Name</b>                                                                           | <b>Chromosome</b> |
|-----------------------------------|---------------------------------------------------------------------------------------|-------------------|
| <i>ACAT2</i>                      | acetyl-CoA acetyltransferase 2( <i>ACAT2</i> )                                        | 6                 |
| <i>ACKR3</i>                      | atypical chemokine receptor 3( <i>ACKR3</i> )                                         | 2                 |
| <i>ADGB</i>                       | androglobin( <i>ADGB</i> )                                                            | 6                 |
| <i>ANKRD20A7P</i>                 | ankyrin repeat domain 20 family member A7, pseudogene( <i>ANKRD20A7P</i> )            | 9                 |
| <i>ARMC10</i>                     | armadillo repeat containing 10( <i>ARMC10</i> )                                       | 7                 |
| <i>ARRB2</i>                      | arrestin beta 2( <i>ARRB2</i> )                                                       | 17                |
| <i>ARSE</i>                       | arylsulfatase E (chondrodysplasia punctata 1)( <i>ARSE</i> )                          | X                 |
| <i>BLACE</i>                      | B-cell acute lymphoblastic leukemia expressed( <i>BLACE</i> )                         | 7                 |
| <i>C2orf81</i>                    | chromosome 2 open reading frame 81( <i>C2orf81</i> )                                  | 2                 |
| <i>C5orf17</i>                    | chromosome 5 open reading frame 17( <i>C5orf17</i> )                                  | 5                 |
| <i>C6orf25</i>                    | chromosome 6 open reading frame 25( <i>C6orf25</i> )                                  | 6                 |
| <i>CCDC144NL</i>                  | coiled-coil domain containing 144 family, N-terminal like( <i>CCDC144NL</i> )         | 17                |
| <i>CFDP1</i>                      | craniofacial development protein 1( <i>CFDP1</i> )                                    | 16                |
| <i>CRYGEP</i>                     | crystallin gamma E, pseudogene( <i>CRYGEP</i> )                                       | 2                 |
| <i>CUZD1</i>                      | CUB and zona pellucida like domains 1( <i>CUZD1</i> )                                 | 10                |
| <i>DLGAP2</i>   <i>ERICH1-AS1</i> | DLG associated protein 2( <i>DLGAP2</i> )                                             | 8                 |
| <i>DPYS</i>                       | dihydropyrimidinase( <i>DPYS</i> )                                                    | 8                 |
| <i>DUSP22</i>                     | dual specificity phosphatase 22( <i>DUSP22</i> )                                      | 6                 |
| <i>EBF3</i>                       | early B-cell factor 3( <i>EBF3</i> )                                                  | 10                |
| <i>EEPD1</i>                      | endonuclease/exonuclease/phosphatase family domain containing 1( <i>EEPD1</i> )       | 7                 |
| <i>EIF1AXP1</i>                   | eukaryotic translation initiation factor 1A, X-linked pseudogene 1( <i>EIF1AXP1</i> ) | 1                 |
| <i>EIF2B5</i>                     | eukaryotic translation initiation factor 2B subunit epsilon( <i>EIF2B5</i> )          | 3                 |
| <i>EPHA6</i>                      | EPH receptor A6( <i>EPHA6</i> )                                                       | 3                 |
| <i>ESPNP</i>                      | espin pseudogene( <i>ESPNP</i> )                                                      | 1                 |
| <i>FAAP20</i>   <i>C1orf86</i>    | Fanconi anemia core complex associated protein 20( <i>FAAP20</i> )                    | 1                 |
| <i>FAM24B</i>                     | family with sequence similarity 24 member B( <i>FAM24B</i> )                          | 10                |
| <i>FBXL13</i>                     | F-box and leucine rich repeat protein 13( <i>FBXL13</i> )                             | 7                 |
| <i>FIP1L1</i>                     | factor interacting with PAPOLA and CPSF1( <i>FIP1L1</i> )                             | 4                 |
| <i>FN3K</i>                       | fructosamine 3 kinase( <i>FN3K</i> )                                                  | 17                |
| <i>GFPT2</i>                      | glutamine-fructose-6-phosphate transaminase 2( <i>GFPT2</i> )                         | 5                 |
| <i>HLA-DRB9</i>                   | major histocompatibility complex, class II, DR beta 9 (pseudogene)( <i>HLA-DRB9</i> ) | 6                 |
| <i>HOOK2</i>                      | hook microtubule tethering protein 2( <i>HOOK2</i> )                                  | 19                |
| <i>HOXA3</i>                      | homeobox A3( <i>HOXA3</i> )                                                           | 7                 |
| <i>HOXA4</i>                      | homeobox A4( <i>HOXA4</i> )                                                           | 7                 |
| <i>HOXA-AS2</i>                   | HOXA cluster antisense RNA 2( <i>HOXA-AS2</i> )                                       | 7                 |
| <i>HOXA-AS3</i>                   | HOXA cluster antisense RNA 3( <i>HOXA-AS3</i> )                                       | 7                 |
| <i>HOXB3</i>                      | homeobox B3( <i>HOXB3</i> )                                                           | 17                |
| <i>HOXB6</i>                      | homeobox B6( <i>HOXB6</i> )                                                           | 17                |
| <i>HOXB-AS3</i>                   | HOXB cluster antisense RNA 3( <i>HOXB-AS3</i> )                                       | 17                |
| <i>IGF2BP1</i>                    | insulin like growth factor 2 mRNA binding protein 1( <i>IGF2BP1</i> )                 | 17                |
| <i>KATNBL1P6</i>                  | katanin regulatory subunit B1 like 1 pseudogene 6( <i>KATNBL1P6</i> )                 | 6                 |
| <i>LINC01237</i>                  | long intergenic non-protein coding RNA 1237( <i>LINC01237</i> )                       | 2                 |
| <i>LRCOL1</i>                     | leucine rich colipase like 1( <i>LRCOL1</i> )                                         | 12                |
| <i>LZTS3</i>                      | leucine zipper tumor suppressor family member 3( <i>LZTS3</i> )                       | 20                |

|                  |                                                                   |    |
|------------------|-------------------------------------------------------------------|----|
| <i>MEI1</i>      | meiotic double-stranded break formation protein 1(MEI1)           | 22 |
| <i>MYT1L</i>     | myelin transcription factor 1 like(MYT1L)                         | 2  |
| <i>NBPF13P</i>   | neuroblastoma breakpoint family member 13, pseudogene(NBPF13P)    | 1  |
| <i>NLRP1</i>     | NLR family pyrin domain containing 1(NLRP1)                       | 17 |
| <i>OR2L13</i>    | olfactory receptor family 2 subfamily L member 13(OR2L13)         | 1  |
| <i>P4HA2</i>     | prolyl 4-hydroxylase subunit alpha 2(P4HA2)                       | 5  |
| <i>PACRG</i>     | PARK2 coregulated(PACRG)                                          | 6  |
| <i>PDLIM4</i>    | PDZ and LIM domain 4(PDLIM4)                                      | 5  |
| <i>PKP3</i>      | plakophilin 3(PKP3)                                               | 11 |
| <i>PM20D1</i>    | peptidase M20 domain containing 1(PM20D1)                         | 1  |
| <i>POU6F2</i>    | POU class 6 homeobox 2(POU6F2)                                    | 7  |
| <i>PRDM16</i>    | PR/SET domain 16(PRDM16)                                          | 1  |
| <i>PRRT3</i>     | proline rich transmembrane protein 3(PRRT3)                       | 3  |
| <i>PRRT3-AS1</i> | PRRT3 antisense RNA 1(PRRT3-AS1)                                  | 3  |
| <i>PTPRN2</i>    | protein tyrosine phosphatase, receptor type N2(PTPRN2)            | 7  |
| <i>RAD51B</i>    | RAD51 paralog B(RAD51B)                                           | 14 |
| <i>RALGAPA1</i>  | Ral GTPase activating protein catalytic alpha subunit 1(RALGAPA1) | 14 |
| <i>SCRIB</i>     | scribbled planar cell polarity protein(SCRIB)                     | 8  |
| <i>SOD2</i>      | superoxide dismutase 2, mitochondrial(SOD2)                       | 6  |
| <i>STK32C</i>    | serine/threonine kinase 32C(STK32C)                               | 10 |
| <i>TCP10L2</i>   | t-complex 10-like 2(TCP10L2)                                      | 6  |
| <i>TENM2</i>     | teneurin transmembrane protein 2(TENM2)                           | 5  |
| <i>TMEM131</i>   | transmembrane protein 131(TMEM131)                                | 2  |
| <i>TPGS1</i>     | tubulin polyglutamylase complex subunit 1(TPGS1)                  | 19 |
| <i>VIPR2</i>     | vasoactive intestinal peptide receptor 2(VIPR2)                   | 7  |
| <i>VWA5B2</i>    | von Willebrand factor A domain containing 5B2(VWA5B2)             | 3  |
| <i>WSCD1</i>     | WSC domain containing 1(WSCD1)                                    | 17 |
| <i>ZNF331</i>    | zinc finger protein 331(ZNF331)                                   | 19 |
| <i>ZNF714</i>    | zinc finger protein 714(ZNF714)                                   | 19 |
| <i>ZPBP</i>      | zona pellucida binding protein(ZPBP)                              | 7  |

---

**Supplementary Table 3:** Clinical characteristics of all the patients with bipolar disorder included in the global methylation study

|                                    | <b>LiER</b>     | <b>LiPR</b>    | <b>LiNR</b>    |
|------------------------------------|-----------------|----------------|----------------|
| N                                  | 15              | 14             | 11             |
| Alda range                         | 7-10            | 4-6            | 0-3            |
| Ratio Male/Female                  | 8/7             | 4/10           | 6/5            |
| Age                                | 49.85 +/- 11.24 | 46.67 +/- 9.63 | 46.58 +/- 6.54 |
| BD type 1                          | 100%            | 100%           | 100%           |
| BMI                                | 24.48 +/- 3.26  | 25.88 +/- 5.43 | 25.71 +/- 3.16 |
| Smokers yes/no                     | 6/9             | 8/6            | 6/5            |
| <b>Current medication</b>          |                 |                |                |
| Li yes/no                          | 14/1            | 12/0           | 5/6            |
| Anticonvulsants yes/no             | 3/12            | 6/8            | 5/6            |
| Atypical antipsychotic yes/no      | 0/15            | 6/8            | 7/4            |
| Antidepressants yes/no             | 3/12            | 4/10           | 4/7            |
| Number of psychotropic drugs 1/2/3 | 11/3/1          | 0/11/3         | 3/4/4          |

**Supplementary Table 4:** Number of CpGs captured and average read depth of each of the CpGs per sample.

| sample      | nb_CpGs | mean_coverage |
|-------------|---------|---------------|
| GAN-001-620 | 3686657 | 17.89         |
| GAN-001-621 | 3684864 | 15.81         |
| GAN-001-628 | 3686607 | 18.34         |
| GAN-007-013 | 3686703 | 17.53         |
| GAN-007-018 | 3685961 | 15.37         |
| GAN-007-020 | 3686832 | 18.19         |
| GAN-007-022 | 3679576 | 14.65         |
| GAN-007-040 | 3685557 | 16.65         |
| GAN-007-047 | 3686785 | 18.71         |
| GAN-007-048 | 3686755 | 18.26         |
| GAN-007-055 | 3685091 | 20.62         |
| GAN-007-057 | 3686682 | 19.26         |
| BP-440      | 3686649 | 18.2          |
| BP-516      | 3678799 | 11.62         |
| BB-204      | 3686560 | 17.94         |
| BB-205      | 3686367 | 17.11         |
| GAN-001-627 | 3686135 | 17.57         |
| GAN-007-017 | 3686940 | 18.67         |
| GAN-007-024 | 3682032 | 16.37         |
| GAN-007-027 | 3686195 | 17.15         |
| GAN-007-035 | 3686793 | 18.6          |
| GAN-007-036 | 3686476 | 17.04         |
| GAN-007-043 | 3683749 | 18.65         |
| GAN-007-044 | 3674526 | 9.7           |
| GAN-007-054 | 3686457 | 17.75         |
| GAN-007-058 | 3684267 | 14.15         |
| GAN-007-062 | 3687031 | 20.18         |
| BP-231      | 3686061 | 17.54         |
